# Supplementary material for: Chronic stress promotes tumor growth and angiogenesis in a mouse model of ovarian carcinoma
Source: Springer Nature journal article supplement (doi:10.1038/nm1447), 2006-07-23
Supplement: nm1447-S5.pdf [file nm1447-S5.pdf]

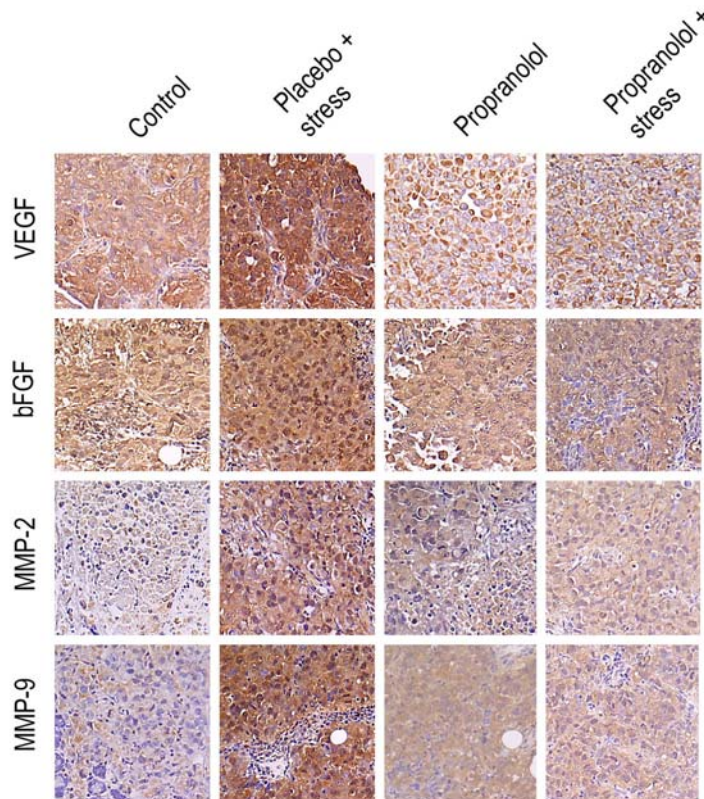

**Supplementary Figure 5. Angiogenic cytokine expression in tumors from stressed mice.** Immunohistochemistry for vascular endothelial growth factor (VEGF), basic fibroblast growth factor (bFGF), matrix metalloproteinase-2 (MMP-2) and MMP-9 was performed on HeyA8 tumor samples from control and stressed animals treated with placebo or propranolol (tumors were harvested from the groups shown in **Fig. 1e** in the main paper). All pictures were taken at original magnification x200.
